# Supplementary material
Source: PubMed Central journal article supplement (PMC4002142)
Supplement: cmi201337x1.pdf [file cmi201337x1.pdf]

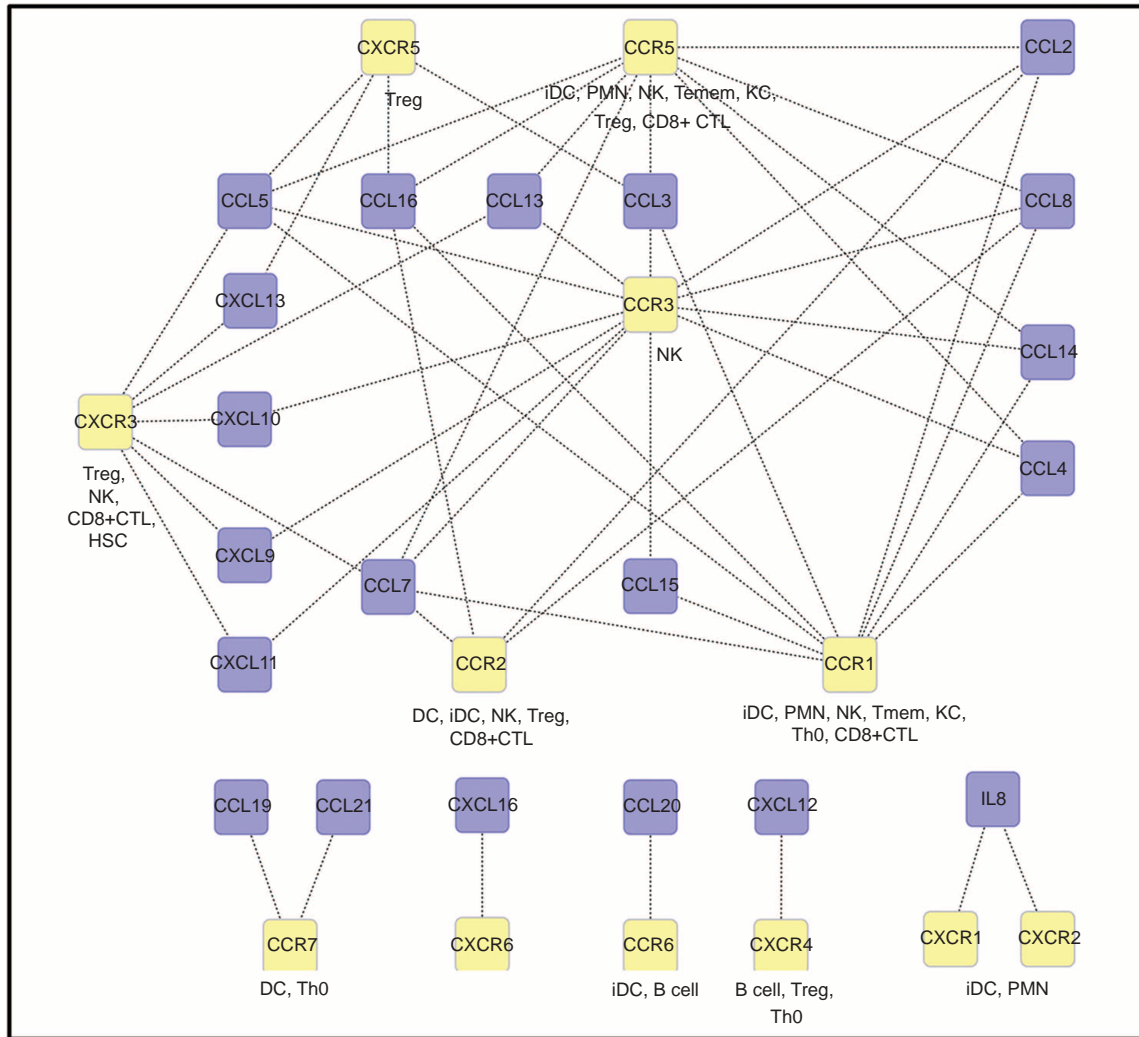

**Supplemental Figure 1** Chemokine receptor-ligand interaction network. Cytoscape version 3.01 was used in junction StringDB to generate interactions between chemokines (purple) and receptors (yellow). Interactions were restricted to those which have been experimentally validated. CCR, CC-chemokine receptor; CTL, cytotoxic T lymphocyte; CXCR, CXC chemokine receptor; HCV, hepatitis C virus; HSC, hepatic stellate cell; iDC, immature dendritic cell; KC, Kupffer cell; NK, natural killer; PMN, polymorphonuclear neutrophil; Tmem, memory T cell; Th, helper T cell; Treg, regulatory T cell.
